# Supplementary material for: Circulating Fatty Acids Associate with Metabolic Changes in Adolescents Living with Obesity
Source: MDPI journal article supplement (doi:10.3390/biomedicines12040883), 2024-04-17
Supplement: s1 [file s1]

**Table S1A.** Socio-demographic, anthropometric, redox and lipid parameters and plasma FAs of adolescent boys living with obesity or with healthy weight (control).

| Parameter                  | Obese boys            | Control boys          | p       |
|----------------------------|-----------------------|-----------------------|---------|
| Sex (male/female)          | 45                    | 22                    | /       |
| Age (yr)                   | 14.0 (11.5 - 15.0)    | 14.5 (12.0-15.5)      | ns      |
| BMI (kg/m <sup>2</sup> )   | 33.2 (29.0 -37.0)     | 18.6 (16.0 - 19.0)    | < 0.001 |
| Total cholesterol (mmol/L) | 4.40 (3.70 - 4.80)    | 4.0 (3.57 -4.78)      | ns      |
| LDL-cholesterol (mmol/L)   | 2.48 (2.39 - 3.03)    | 1.87 (1.60-2.77)      | 0.01    |
| HDL-cholesterol (mmol/L)   | 1.19 (0.97 - 1.44)    | 1.63 (1.45-1.72)      | 0.01    |
| Triglycerides (mmol/L)     | 1.17 (0.75 - 1.30)    | 0.70 (0.59 - 0.79)    | 0.01    |
| RFCVD                      | 3.9 (2.9 - 4.2)       | 2.5 (2.1 - 2.9)       | 0.01    |
| IA                         | 2.4 (1.7 - 2.6)       | 1.2 (1.0 - 1.7)       | 0.01    |
| TAS (mmol/L)               | 721(647 - 780)        | 437 (282 - 398)       | < 0.001 |
| SOD (U/L)                  | 92 (80 - 115)         | 135 (132 - 140)       | < 0.001 |
| SHG (mmol/L)               | 0.349 (0.237 - 0.398) | 0.450 (0.380 - 0.561) | < 0.001 |
| TOS (mmol/L)               | 102 (85 - 105)        | 63 (60 - 78)          | < 0.001 |
| AOPPs (μmol/L)             | 78.6 (65.0 - 95.9)    | 46.9 (41.7 - 52.1)    | < 0.001 |
| PAB (HK)                   | 100.9 (95.2 - 111.0)  | 59.8 (51.3 - 68.0)    | < 0.001 |
| PON (U/L)                  | 174 (130 - 319)       | 266 (185 - 574)       | < 0.001 |
| rLTL                       | 0.640 (0.435 - 0.869) | 1.591 (1.525 - 1.814) | < 0.001 |
| 14:0 (%)                   | 2.87 (1.45 - 4.09)    | 0.72 (0.61 - 0.89)    | < 0.001 |
| 16:0 (%)                   | 27.9 (26.11 - 28.30)  | 26.4 (23.71 - 27.48)  | ns      |
| 18:0 (%)                   | 11.54 (10.05 - 12.44) | 12.39 (11.52 - 13.23) | 0.023   |
| 18:1n-9 (%)                | 11.36 (10.20 - 12.26) | 11.62 (11.04 - 13.99) | ns      |
| 18:2n-6 (%)                | 24.39 (23.61 - 26.04) | 24.11 (21.84 - 26.21) | ns      |
| 20:3n-3 (%)                | 2.03 (1.92 - 2.25)    | 1.77 (1.69 - 2.07)    | 0.040   |

|                       |                       |                       |         |
|-----------------------|-----------------------|-----------------------|---------|
| 20:4n-6 (%)           | 10.23 (9.00 - 10.86)  | 11.0 (10.30 - 11.69)  | 0.040   |
| 22:1n-9 (%)           | 1.87 (1.48 - 3.50)    | 0.71 (0.47 - 0.98)    | < 0.001 |
| 22:4n-6 (%)           | 0.40 (0.31 - 0.72)    | 0.73 (0.43 - 0.92)    | 0.05    |
| 20:5n-3 (%)           | 0.87 (0.74 - 0.97)    | 1.12 (0.87 - 1.28)    | 0.012   |
| 22:5n-3 (%)           | 0.38 (0.30 - 0.50)    | 0.81 (0.59 - 0.90)    | 0.015   |
| 22:6n-3 (%)           | 2.15 (1.74 - 3.00)    | 2.43 (2.04 - 2.56)    | ns      |
| Total n-3 PUFAs       | 5.43 (4.70 - 6.72)    | 6.13 (5.19 -6.81)     | 0.001   |
| Total n-6 PUFAs       | 35.02 (32.92 - 37.62) | 35.84 (32.87 - 38.82) | ns      |
| n-6 to n-3 PUFA ratio | 6.44 (5.60 - 7.15)    | 5.84 (4.91 - 6.40)    | 0.01    |

Abbreviations: HDL, high-density lipoprotein; LDL, low-density lipoprotein; RFCVD, risk factor for cardiovascular disease; IA, index of atherosclerosis; ns, non-significant; TAS, total antioxidant status; SOD, superoxide dismutase; SHG, total sulfhydryl group; TOS, total oxidative status; AOPPs, advanced oxidation protein products; PAB, prooxidant-antioxidant balance; PON, paraoxanase; 14:0, myristic acid; 16:0, palmitic acid; 18:0, stearic acid; 18:1n-9, oleic acid; 18:2n-6, linoleic acid; 20:3n-3, eicosatrienoic acid; 20:5n-3, eicosapentaenoic acid (EPA); 20:4n-6, arachidonic acid; 22:1n-9, erucic acid; 22:4n-6, docosatetraenoic acid; 22:5n-3, docosapentaenoic acid (DPA); 22:6n-3, docosahexaenoic acid (DHA); n-3, omega-3; n-6, omega-6; PUFA, polyunsaturated fatty acid.

**Table S1B.** Socio-demographic, anthropometric, redox and lipid parameters and plasma FAs of adolescent girls living with obesity or with healthy weight (control).

| Parameter                  | Obese girls           | Control girls           | p       |
|----------------------------|-----------------------|-------------------------|---------|
| Sex (male/female)          | 46                    | 22                      | /       |
| Age (yr)                   | 15.5 (12.5 - 16.5)    | 15 (12.5-16.0)          | ns      |
| BMI (kg/m <sup>2</sup> )   | 33.3 (29.0 -39.2)     | 17.9 (15.5 - 19.2)      | < 0.001 |
| Total cholesterol (mmol/L) | 4.59 (3.80 - 5.12)    | 4.20 (3.97-4.80)        | ns      |
| LDL-cholesterol (mmol/L)   | 2.69 (2.36 - 3.17)    | 2.31 (1.96-2.75)        | ns      |
| HDL-cholesterol (mmol/L)   | 1.27 (1.05 - 1.57)    | 1.42 (1.24-1.60)        | ns      |
| Triglycerides (mmol/L)     | 0.99 (0.59 - 1.23)    | 0.70 (0.61 - 0.91)      | ns      |
| RFCVD                      | 3.4 (2.9 - 4.0)       | 3.0 (2.5 - 3.5)         | ns      |
| IA                         | 2.1 (1.5 - 2.7)       | 1.7 (1.4 - 2.2)         | ns      |
| TAS (mmol/L)               | 735 (660 - 792)       | 440 (295 - 404)         | < 0.001 |
| SOD (U/L)                  | 97 (84 - 120)         | 141 (138 - 146)         | < 0.001 |
| SHG (mmol/L)               | 0.348 (0.235 - 0.399) | 0.451 (0.771 - 0.560)   | < 0.001 |
| TOS (mmol/L)               | 99 (80 - 101)         | 60 (55 - 74)            | < 0.001 |
| AOPPs (μmol/L)             | 77.7 (64.4 - 95.0)    | 43.7 (40.0 - 49.2)      | < 0.001 |
| PAB (HK)                   | 100.0 (94.1 - 109.9)  | 58.7 (50.6 - 67.1)      | < 0.001 |
| PON (U/L)                  | 168 (120 - 319)       | 258 (187 - 571)         | < 0.001 |
| rLTL                       | 0.646 (0.449 - 0.878) | 1.620 (1.527 - 1.825)   | < 0.001 |
| 14:0 (%)                   | 2.75 (1.38 - 4.00)    | 0.67 (0.52 - 0.80)      | < 0.001 |
| 16:0 (%)                   | 27.0 (25.96 - 28.21)  | 26.1 (23.60 - 26.98)    | ns      |
| 18:0 (%)                   | 11.39 (9.96 - 12.34)  | 12.30 (11.41 - 13.17)   | 0.02    |
| 18:1n-9 (%)                | 11.44 (10.20 - 12.29) | 11.66 (11.012 - 14.901) | ns      |
| 18:2n-6 (%)                | 24.44 (22.99 - 26.14) | 24.20 (21.91 - 26.29)   | ns      |
| 20:3n-3 (%)                | 1.98 (1.87 - 2.10)    | 1.61 (1.64 - 2.06)      | ns      |

|                       |                       |                       |         |
|-----------------------|-----------------------|-----------------------|---------|
| 20:4n-6 (%)           | 10.26 (9.02 - 10.89)  | 11.00 (10.32 - 11.70) | 0.045   |
| 22:1n-9 (%)           | 1.87 (1.40 - 3.49)    | 0.69 (0.42 - 0.94)    | < 0.001 |
| 22:4n-6 (%)           | 0.36 (0.25 - 0.68)    | 0.67 (0.40 - 0.90)    | 0.032   |
| 20:5n-3 (%)           | 0.80 (0.86 - 1.07)    | 1.19 (0.93 - 1.34)    | 0.04    |
| 22:5n-3 (%)           | 0.52 (0.32 - 0.65)    | 0.77 (0.62 - 0.95)    | 0.045   |
| 22:6n-3 (%)           | 2.19 (1.80 - 3.05)    | 2.49 (2.12 - 2.62)    | ns      |
| Total n-3 PUFAs       | 5.49 (4.85 - 6.87)    | 6.26 (5.31 - 6.97)    | 0.003   |
| Total n-6 PUFAs       | 35.06 (32.96 - 37.75) | 35.87 (32.63 - 38.89) | ns      |
| n-6 to n-3 PUFA ratio | 6.38 (5.51 - 7.09)    | 5.73 (4.95 - 6.44)    | 0.01    |

Abbreviations: HDL, high-density lipoprotein; LDL, low-density lipoprotein; RFCVD, risk factor for cardiovascular disease; IA, index of atherosclerosis; ns, non-significant; TAS, total antioxidant status; SOD, superoxide dismutase; SHG, total sulfhydryl group; TOS, total oxidative status; AOPPs, advanced oxidation protein products; PAB, prooxidant-antioxidant balance; PON, paraoxanase; 14:0, myristic acid; 16:0, palmitic acid; 18:0, stearic acid; 18:1n-9, oleic acid; 18:2n-6, linoleic acid; 20:3n-3, eicosatrienoic acid; 20:5n-3, eicosapentaenoic acid (EPA); 20:4n-6, arachidonic acid; 22:1n-9, erucic acid; 22:4n-6, docosatetraenoic acid; 22:5n-3, docosapentaenoic acid (DPA); 22:6n-3, docosahexaenoic acid (DHA); n-3, omega-3; n-6, omega-6; PUFA, polyunsaturated fatty acid.
